# Supplementary material for: Novel Mechanism and Kinetics of Tetramethrin Degradation Using an Indigenous Gordonia cholesterolivorans A16
Source: MDPI journal article supplement (doi:10.3390/ijms22179242), 2021-08-26
Supplement: s1 [file s1]

## Supplementary Materials

### **Novel mechanism and kinetics of tetramethrin degradation using an indigenous *Gordonia cholesterolivorans* A16**

Yuxin Guo<sup>1,2#</sup>, Yaohua Huang<sup>1,2#</sup>, Shimei Pang<sup>1,2#</sup>, Tianhao Zhou<sup>1,2#</sup>, Ziqiu Lin<sup>1,2</sup>,

Hongxiao Yu, Guorui Zhang, Pankaj Bhatt<sup>1,2\*</sup>, Shaohua Chen<sup>1,2\*</sup>

<sup>1</sup>*State Key Laboratory for Conservation and Utilization of Subtropical Agro-bioresources, Integrative Microbiology Research Centre, South China Agricultural University, Guangzhou 510642, China;*

<sup>2</sup>*Guangdong Laboratory for Lingnan Modern Agriculture, Guangzhou 510642, China*

# These authors contributed equally to this work.

#### **\*Corresponding authors**

Shaohua Chen, Pankaj Bhatt

South China Agricultural University, Guangzhou 510642, China

Tel: +86-20-8528 8229

Fax: +86-20-8528 0292

Email: shchen@scau.edu.cn (S.C); pankajbhatt.bhatt472@gmail.com (P.B)

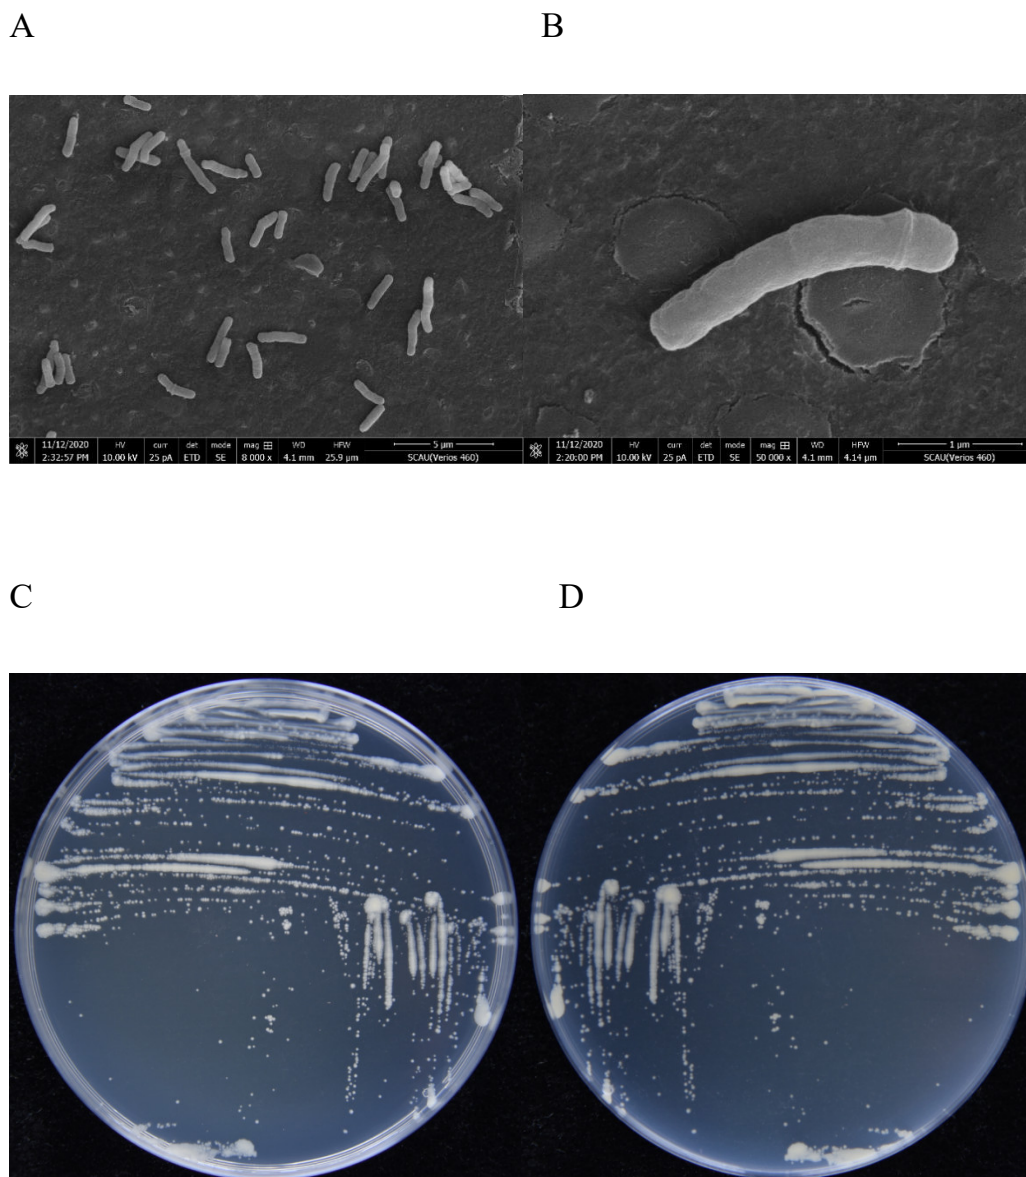

**Figure S1.** Morphological characteristics of *Gordonia cholesterolivorans* strain A16.

Pictures A (1000×) and B (5000×) are scanning electron micrographs. Pictures C and D are front and back sides of strain A16 grown on LB agar plates.

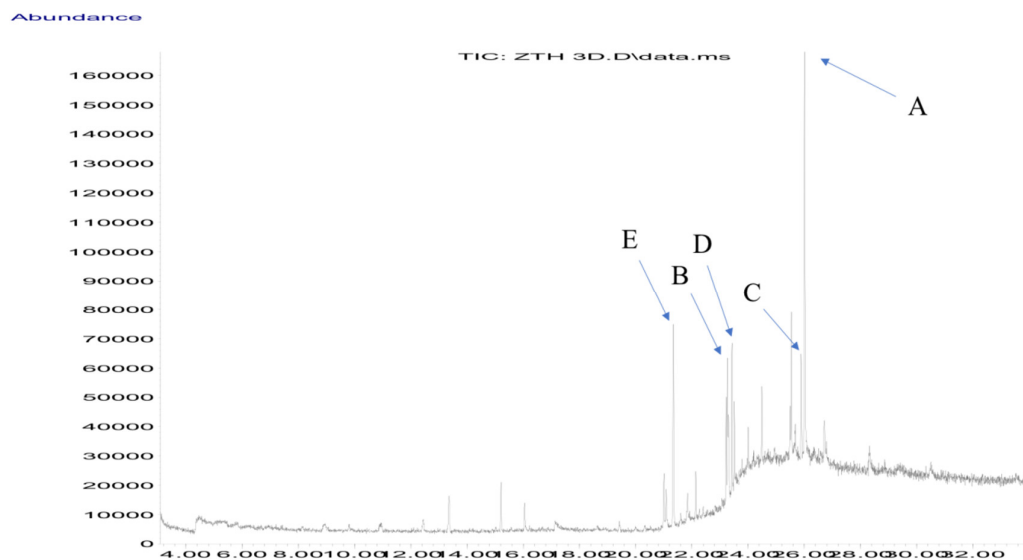

**Figure S2.** Chromatogram of tetramethrin metabolism by *Gordonia cholesterolivorans* strain A16. (A) Tetramethrin, 26.0 min; (B) cyclopropylmethanol, 23.1 min; (C) 2-butyl-4,5,6,7-tetrahydro-1H-isoindole-1,3(2H)-dione, 25.9 min; (D) acrylamide, 23.5 min; (E) *N*-ethylacetamide, 21.3 min.

A

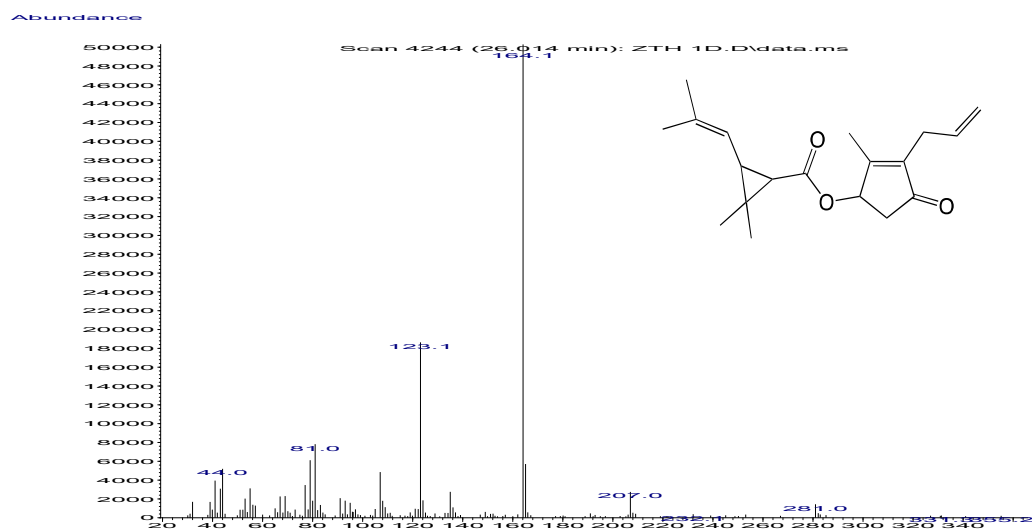

B

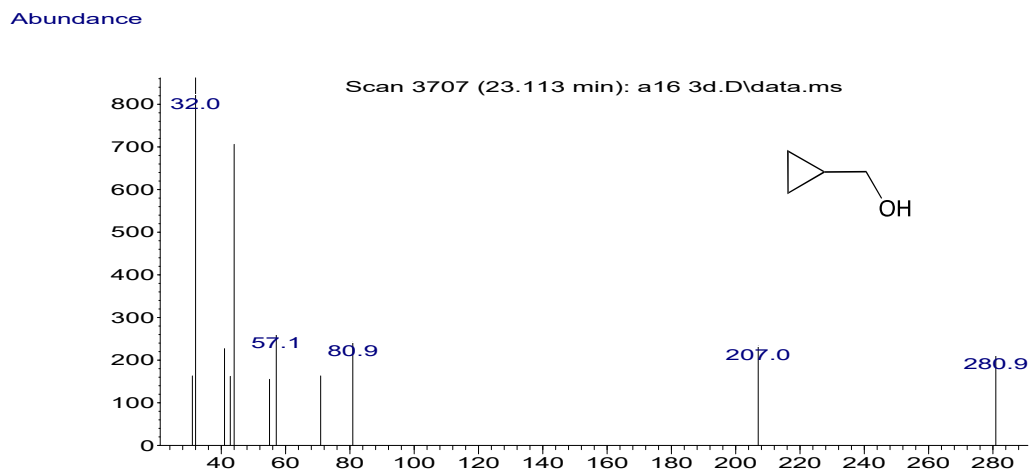

C

Abundance

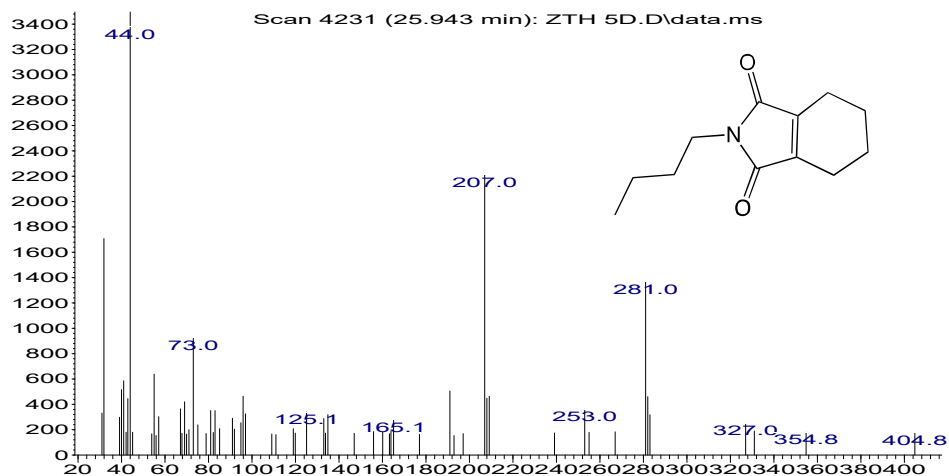

D

Abundance

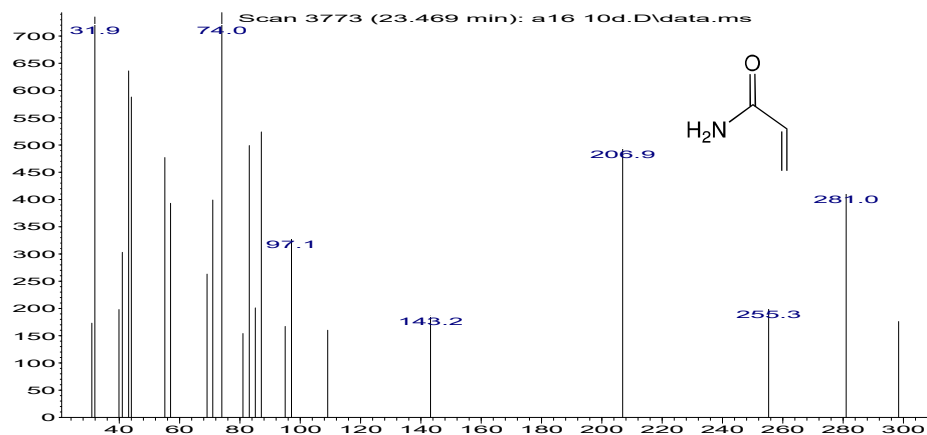

E

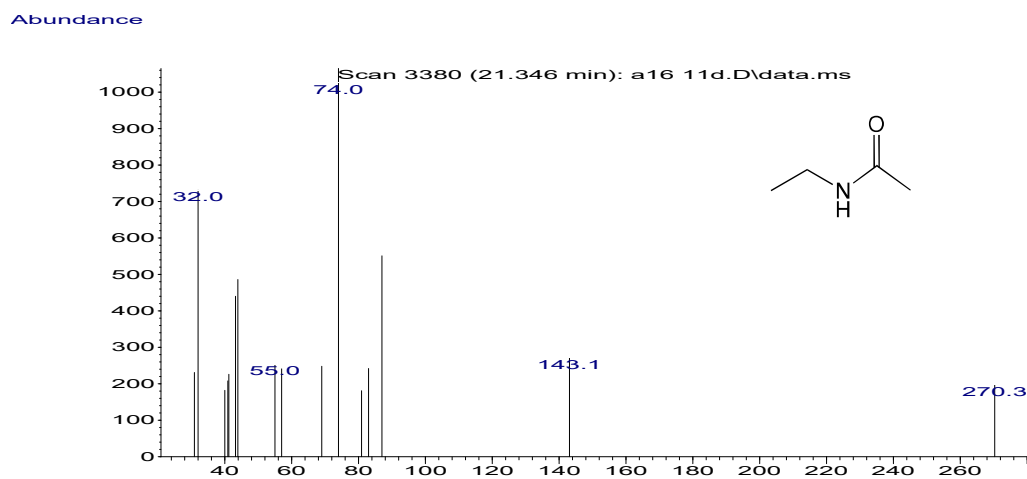

**Figure S3.** Gas chromatography-mass spectrometry (GC-MS) analysis of the metabolites produced during tetramethrin degradation by *Gordonia cholesterylivorans* strain A16. (A) Tetramethrin; (B) cyclopropylmethanol; (C) 2-butyl-4,5,6,7-tetrahydro-1H-isoindole-1,3(2H)-dione; (D) acrylamide; (E) *N*-ethylacetamide.

A

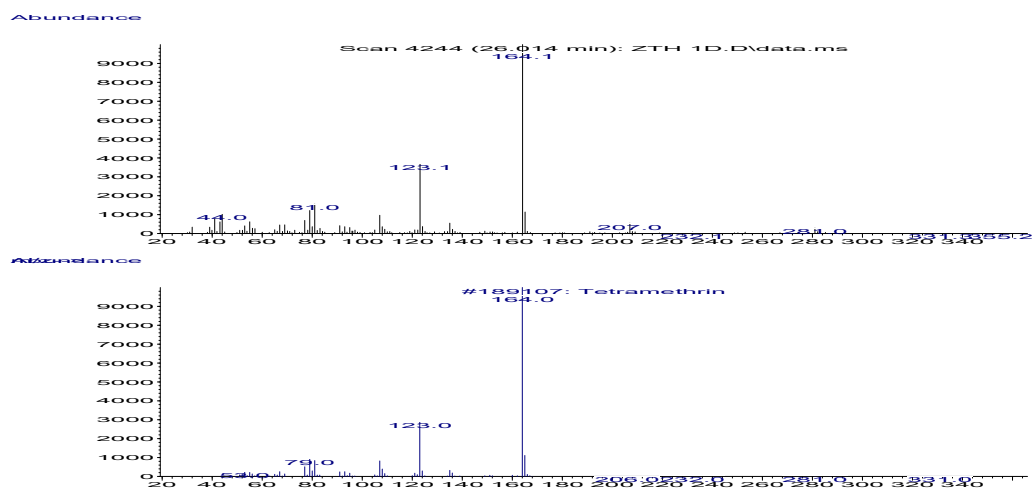

B

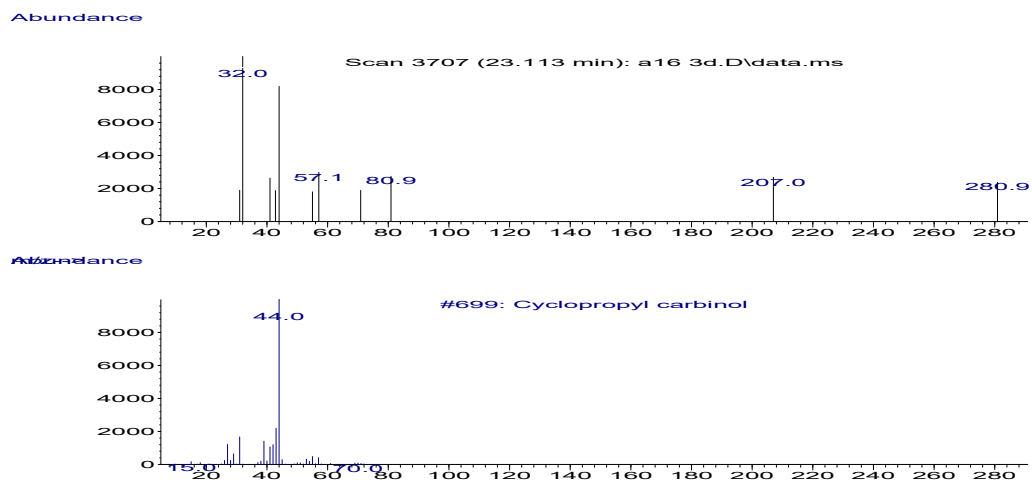

C

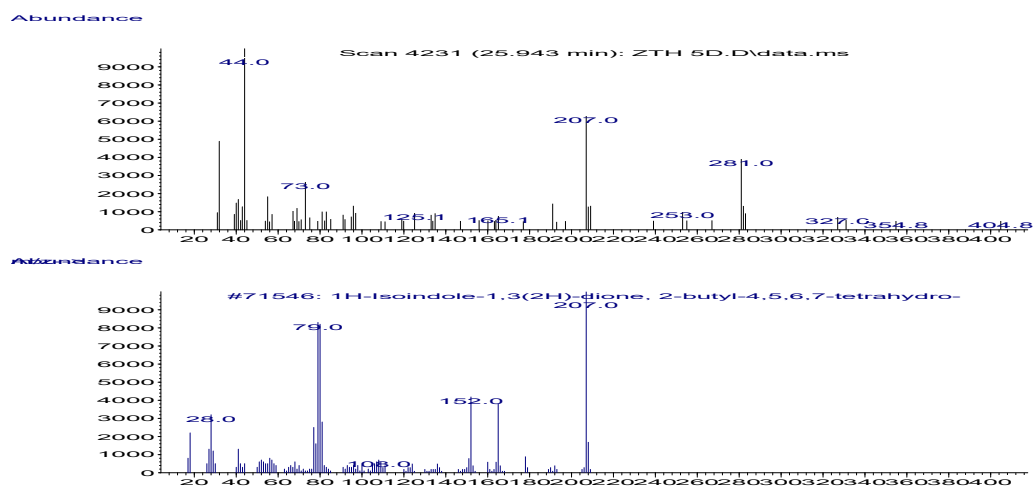

D

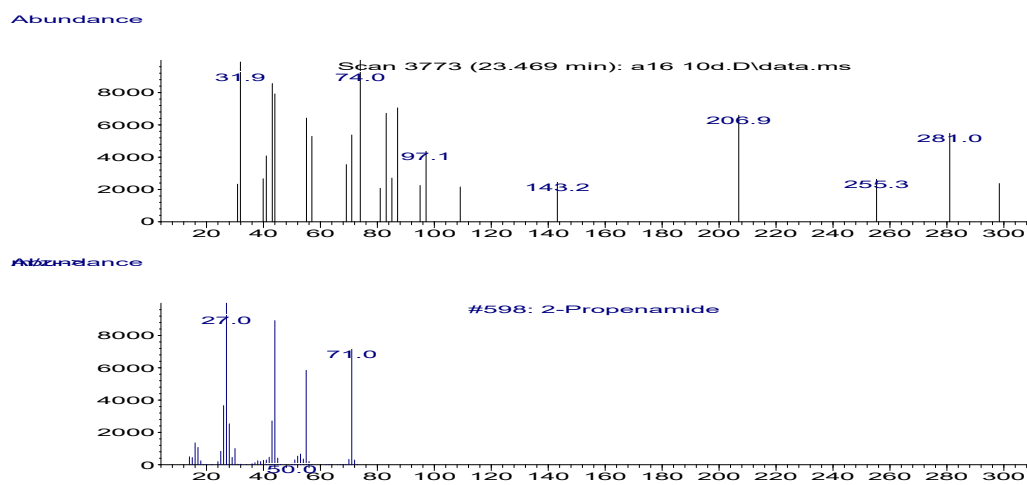



E

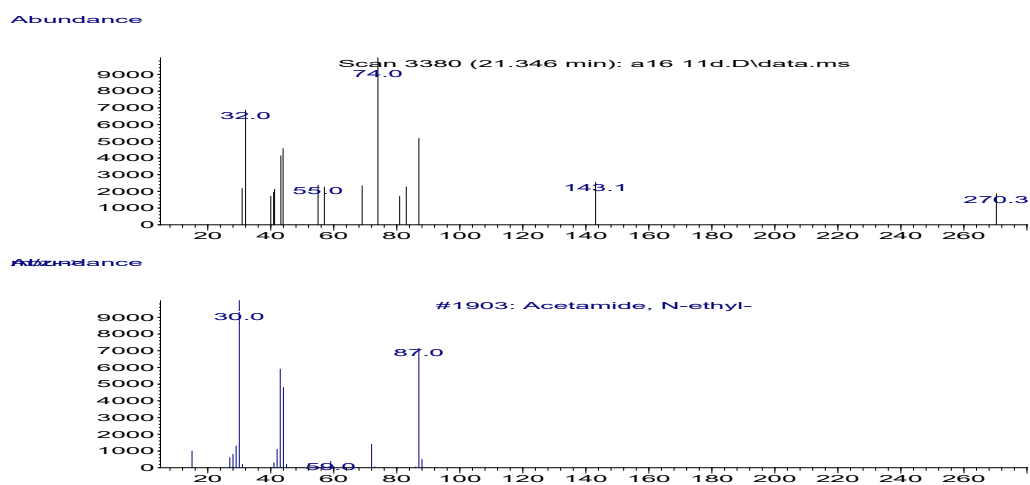

**Figure S4.** The mass spectra of tetramethrin metabolites reported in the National Institute of Standards and Technology (NIST, United States) library database. (A) Tetramethrin; (B) cyclopropylmethanol; (C) 2-butyl-4,5,6,7-tetrahydro-1H-isoindole-1,3(2H)-dione; (D) acrylamide; (E) *N*-ethylacetamide.
